# Supplementary material for: Impacts of Dual-Income Household Rate on Suicide Mortalities in Japan
Source: MDPI journal article supplement (doi:10.3390/ijerph18115670), 2021-05-25
Supplement: s1 [file s1]

## Supplemental Data

**Supplementary Table 1:** The summary of descriptive statistics of suicide mortalities desegregated by gender-age- and motive-factors between 2008 and 2017 (dependent variables). (p2).

**Supplementary Table 2:** Effects of the execution amount of EFECBSC sub-divisions, unemployment rate and GDP per capita on EBSMR trends of male plus female, male and female. (p2).

**Supplementary Table 3:** Impacts of dual-income household rate, other household and social/employment factors on suicide mortalities of Male+Female caused by motives associated with family-, health-, economy-, employment-, romance- and school-related problems between 2009 and 2017. (p3).

**Supplementary Table 4:** Impacts of dual-income household rate, other household and social factors on suicide mortalities of Male caused by motives associated with family-, health-, economy-, employment-, romance- and school-related problems between 2009 and 2017. (p3).

**Supplementary Table 5:** Impacts of dual-income household rate, other household and social factors on suicide mortalities of Female caused by motives associated with family-, health-, economy-, employment-, romance- and school-related problems between 2009 and 2017. (p4).

**Supplementary Table 6:** Impacts of dual-income household rate, other household and social factors on age-dependent suicide mortalities of Male+Female between 2009 and 2017. (p4).

**Supplementary Table 7:** Impacts of dual-income household rate, other household and social factors on age-dependent suicide mortalities of Male between 2009 and 2017. (p5).

**Supplementary Table 8:** Impacts of dual-income household rate, other household and social factors on age-dependent suicide mortalities of Female between 2009 and 2017. (p5).

**Supplementary Table S1:** The summary of descriptive statistics of suicide mortalities desegregated by gender- age- and motive-factors between 2009 and 2017 (dependent variables).

|                              | Male+Female |   |      | Male  |   |       | Female |   |      |
|------------------------------|-------------|---|------|-------|---|-------|--------|---|------|
|                              | mean        | ± | SD   | mean  | ± | SD    | mean   | ± | SD   |
| (Age)                        |             |   |      |       |   |       |        |   |      |
| SDR per population (100,000) | 21.25       | ± | 4.20 | 30.74 | ± | 6.51  | 12.32  | ± | 2.61 |
| 10s                          | 2.40        | ± | 1.03 | 3.22  | ± | 1.67  | 1.54   | ± | 1.11 |
| 20s                          | 20.45       | ± | 4.92 | 29.36 | ± | 7.68  | 11.17  | ± | 4.52 |
| 30s                          | 21.87       | ± | 5.20 | 30.28 | ± | 7.60  | 10.96  | ± | 4.04 |
| 40s                          | 25.81       | ± | 6.54 | 36.22 | ± | 10.25 | 12.20  | ± | 4.25 |
| 50s                          | 29.71       | ± | 7.41 | 41.88 | ± | 11.74 | 14.17  | ± | 4.34 |
| 60s                          | 26.23       | ± | 6.85 | 34.92 | ± | 10.09 | 14.34  | ± | 4.48 |
| 70s                          | 26.68       | ± | 6.24 | 35.71 | ± | 9.80  | 17.57  | ± | 5.85 |
| 80s                          | 28.33       | ± | 8.20 | 44.20 | ± | 13.53 | 18.20  | ± | 7.50 |
| (Motive)                     |             |   |      |       |   |       |        |   |      |
| Family                       | 3.22        | ± | 1.00 | 4.33  | ± | 1.50  | 2.20   | ± | 0.81 |
| Health                       | 10.69       | ± | 3.06 | 13.05 | ± | 4.06  | 8.49   | ± | 2.49 |
| Economy                      | 4.19        | ± | 1.87 | 7.79  | ± | 3.56  | 0.82   | ± | 0.45 |
| Employment                   | 1.86        | ± | 0.61 | 3.34  | ± | 1.17  | 0.38   | ± | 0.25 |
| Romance                      | 0.73        | ± | 0.29 | 0.93  | ± | 0.45  | 0.50   | ± | 0.31 |
| School                       | 0.28        | ± | 0.18 | 0.43  | ± | 0.30  | 0.14   | ± | 0.16 |

**Supplementary Table S2:** The summary of descriptive statistics of household and social/employment factors and their VIF (Variance Inflation Factor) between 2009 and 2017 (independent variables and covariates).

|                                                                          | mean   | ± | SD    | VIF  |
|--------------------------------------------------------------------------|--------|---|-------|------|
| (Household factor)                                                       |        |   |       |      |
| dual-income household rate (%)                                           | 26.71  | ± | 3.98  | 2.62 |
| minority rate per household                                              | 0.29   | ± | 0.03  | 1.62 |
| elderly rate per household                                               | 0.06   | ± | 0.02  | 2.07 |
| savings per household (million YEN)                                      | 11.98  | ± | 3.09  | 2.55 |
| liabilities per household (million YEN)                                  | 6.71   | ± | 1.78  | 1.45 |
| yearly incomes per household (million YEN)                               | 6.96   | ± | 0.69  | 3.26 |
| (Social/employment factor)                                               |        |   |       |      |
| employment rate (%)                                                      | 43.01  | ± | 2.83  | 2.49 |
| male temporary employment rate (%)                                       | 2.56   | ± | 0.72  | 3.01 |
| female temporary employment rate (%)                                     | 7.24   | ± | 1.44  | 2.84 |
| certification of long-term Care Insurance ratio per population (100,000) | 185.25 | ± | 19.72 | 1.85 |
| completely unemployment rate (%)                                         | 3.68   | ± | 1.06  | 2.20 |

**Supplementary Table S3:** Impacts of dual-income household rate, other household and social/employment factors on suicide mortalities of Male+Female caused by motives associated with family-, health-, economy-, employment-, romance- and school-related problems between 2009 and 2017.

| Factors                          | family |       |         | health |         |         | economy |    |         | employment |        |         | romance |       |         | school |        |         |        |        |        |       |        |    |
|----------------------------------|--------|-------|---------|--------|---------|---------|---------|----|---------|------------|--------|---------|---------|-------|---------|--------|--------|---------|--------|--------|--------|-------|--------|----|
|                                  | β      | SE    | P value | β      | SE      | P value | β       | SE | P value | β          | SE     | P value | β       | SE    | P value | β      | SE     | P value |        |        |        |       |        |    |
| Model 1                          |        |       |         |        |         |         |         |    |         |            |        |         |         |       |         |        |        |         |        |        |        |       |        |    |
| dual-income rate                 | 0.056  | 0.022 | 0.013   | *      | 0.103   | 0.087   | 0.243   |    | 0.039   | 0.033      | 0.243  |         | 0.034   | 0.013 | 0.015   | *      | -0.006 | 0.005   | 0.193  | 0.007  | 0.003  | 0.068 |        |    |
| X <sup>2</sup> value             | 130.70 |       | <0.001  | **     | 240.78  |         | <0.001  | ** | 132.45  |            | <0.001 | **      | 118.22  |       | <0.001  | **     | 40.33  |         | <0.001 | **     | 48.03  |       | <0.001 | ** |
| Model 2                          |        |       |         |        |         |         |         |    |         |            |        |         |         |       |         |        |        |         |        |        |        |       |        |    |
| dual-income rate                 | 0.093  | 0.025 | 0.000   | **     | 0.270   | 0.095   | 0.007   | ** | 0.140   | 0.036      | 0.000  | **      | 0.049   | 0.017 | 0.006   | **     | 0.005  | 0.006   | 0.427  | 0.009  | 0.004  | 0.023 | *      |    |
| minority rate                    | 0.011  | 0.016 | 0.475   |        | 0.036   | 0.037   | 0.321   |    | 0.045   | 0.023      | 0.049  | *       | 0.005   | 0.009 | 0.607   |        | -0.001 | 0.005   | 0.782  | -0.006 | 0.003  | 0.042 | *      |    |
| elderly rate                     | -0.029 | 0.026 | 0.262   |        | -0.022  | 0.044   | 0.614   |    | 0.048   | 0.035      | 0.161  |         | -0.015  | 0.012 | 0.211   |        | -0.022 | 0.009   | 0.011  | *      | -0.007 | 0.005 | 0.147  |    |
| savings                          | 0.000  | 0.000 | 0.487   |        | 0.000   | 0.000   | 0.761   |    | 0.000   | 0.000      | 0.354  |         | 0.000   | 0.000 | 0.534   |        | 0.000  | 0.000   | 0.919  | 0.000  | 0.000  | 0.132 |        |    |
| liabilities                      | -0.002 | 0.001 | 0.109   |        | 0.000   | 0.002   | 0.847   |    | 0.003   | 0.002      | 0.101  |         | 0.000   | 0.001 | 0.714   |        | 0.000  | 0.000   | 0.967  | 0.000  | 0.000  | 0.525 |        |    |
| yearly incomes                   | 0.000  | 0.000 | 0.957   |        | -0.001  | 0.001   | 0.079   |    | -0.001  | 0.000      | 0.006  | **      | 0.000   | 0.000 | 0.355   |        | 0.000  | 0.000   | 0.118  | 0.000  | 0.000  | 0.463 |        |    |
| employment rate                  | -0.028 | 0.036 | 0.439   |        | -0.362  | 0.111   | 0.001   | ** | -0.130  | 0.061      | 0.034  | *       | -0.004  | 0.024 | 0.864   |        | 0.000  | 0.011   | 0.975  | -0.003 | 0.005  | 0.512 |        |    |
| male temporary employment rate   | 0.102  | 0.147 | 0.486   |        | 0.304   | 0.328   | 0.354   |    | 0.160   | 0.271      | 0.556  |         | 0.073   | 0.071 | 0.307   |        | 0.015  | 0.046   | 0.746  | 0.022  | 0.027  | 0.405 |        |    |
| female temporary employment rate | -0.117 | 0.067 | 0.082   |        | -0.062  | 0.157   | 0.695   |    | -0.225  | 0.095      | 0.018  | *       | -0.060  | 0.035 | 0.081   |        | -0.018 | 0.022   | 0.408  | -0.001 | 0.013  | 0.933 |        |    |
| long-term Care Insurance         | 0.000  | 0.005 | 0.926   |        | -0.041  | 0.015   | 0.006   | ** | -0.039  | 0.009      | 0.000  | **      | -0.002  | 0.002 | 0.314   |        | -0.001 | 0.001   | 0.369  | -0.001 | 0.001  | 0.124 |        |    |
| complete unemployment rate       | 0.307  | 0.069 | 0.000   | **     | 1.276   | 0.205   | 0.000   | ** | 1.091   | 0.094      | 0.000  | **      | 0.142   | 0.046 | 0.002   | **     | 0.073  | 0.028   | 0.008  | **     | 0.014  | 0.011 | 0.206  |    |
| X <sup>2</sup> value             | 212.45 |       | <0.001  | **     | 443.467 |         | <0.001  | ** | 445.867 |            | <0.001 | **      | 160.30  |       | <0.001  | **     | 89.121 |         | <0.001 | **     | 67.518 |       | <0.001 | ** |

\*:P<0.05 and \*\*P<0.01 by hierarchal linear regression model analysis.

**Supplementary Table S4:** Impacts of dual-income household rate, other household and social factors on suicide mortalities of Male caused by motives associated with family-, health-, economy-, employment-, romance- and school-related problems between 2009 and 2017.

| Factors                          | family |       |         | health |         |         | economy |    |         | employment |        |         | romance |       |         | school |        |         |        |        |        |       |        |    |
|----------------------------------|--------|-------|---------|--------|---------|---------|---------|----|---------|------------|--------|---------|---------|-------|---------|--------|--------|---------|--------|--------|--------|-------|--------|----|
|                                  | β      | SE    | P value | β      | SE      | P value | β       | SE | P value | β          | SE     | P value | β       | SE    | P value | β      | SE     | P value |        |        |        |       |        |    |
| Model 1                          |        |       |         |        |         |         |         |    |         |            |        |         |         |       |         |        |        |         |        |        |        |       |        |    |
| dual-income rate                 | 0.097  | 0.032 | 0.004   | **     | 0.138   | 0.110   | 0.214   |    | 0.081   | 0.062      | 0.193  |         | 0.062   | 0.022 | 0.008   | **     | 0.007  | 0.009   | 0.456  | 0.009  | 0.005  | 0.121 |        |    |
| X <sup>2</sup> value             | 127.52 |       | <0.001  | **     | 231.92  |         | <0.001  | ** | 131.65  |            | <0.001 | **      | 107.60  |       | <0.001  | **     | 35.77  |         | <0.001 | **     | 39.61  |       | <0.001 | ** |
| Model 2                          |        |       |         |        |         |         |         |    |         |            |        |         |         |       |         |        |        |         |        |        |        |       |        |    |
| dual-income rate                 | 0.139  | 0.036 | 0.000   | **     | 0.310   | 0.124   | 0.016   | *  | 0.266   | 0.064      | 0.000  | **      | 0.084   | 0.030 | 0.007   | **     | 0.012  | 0.010   | 0.261  | 0.011  | 0.006  | 0.073 |        |    |
| minority rate                    | 0.024  | 0.026 | 0.352   |        | 0.058   | 0.053   | 0.275   |    | 0.082   | 0.044      | 0.062  |         | 0.028   | 0.027 | 0.307   |        | 0.007  | 0.009   | 0.463  | 0.002  | 0.006  | 0.761 |        |    |
| elderly rate                     | -0.003 | 0.037 | 0.939   |        | 0.037   | 0.070   | 0.601   |    | 0.101   | 0.066      | 0.126  |         | 0.035   | 0.027 | 0.197   |        | -0.004 | 0.015   | 0.781  | 0.006  | 0.007  | 0.418 |        |    |
| savings                          | -0.001 | 0.001 | 0.311   |        | 0.001   | 0.003   | 0.800   |    | 0.005   | 0.003      | 0.114  |         | 0.000   | 0.001 | 0.830   |        | -0.001 | 0.001   | 0.248  | 0.000  | 0.000  | 0.283 |        |    |
| liabilities                      | 0.000  | 0.000 | 0.640   |        | -0.001  | 0.001   | 0.415   |    | -0.001  | 0.001      | 0.262  |         | 0.000   | 0.000 | 0.399   |        | 0.000  | 0.000   | 0.859  | 0.000  | 0.000  | 0.042 | *      |    |
| yearly incomes                   | -0.001 | 0.000 | 0.082   |        | -0.002  | 0.001   | 0.070   |    | -0.002  | 0.001      | 0.011  | *       | 0.000   | 0.000 | 0.415   |        | 0.000  | 0.000   | 0.043  | *      | 0.000  | 0.000 | 0.124  |    |
| employment rate                  | -0.082 | 0.054 | 0.130   |        | -0.496  | 0.157   | 0.002   | ** | -0.264  | 0.118      | 0.025  | *       | -0.031  | 0.048 | 0.519   |        | 0.006  | 0.015   | 0.680  | -0.008 | 0.008  | 0.369 |        |    |
| male temporary employment rate   | 0.163  | 0.234 | 0.487   |        | 0.249   | 0.503   | 0.620   |    | 0.342   | 0.517      | 0.508  |         | 0.048   | 0.134 | 0.720   |        | -0.009 | 0.055   | 0.870  | 0.075  | 0.050  | 0.136 |        |    |
| female temporary employment rate | -0.135 | 0.105 | 0.200   |        | -0.014  | 0.251   | 0.955   |    | -0.430  | 0.184      | 0.020  | *       | -0.082  | 0.068 | 0.230   |        | -0.005 | 0.026   | 0.840  | -0.028 | 0.017  | 0.101 |        |    |
| long-term Care Insurance         | -0.006 | 0.007 | 0.404   |        | -0.055  | 0.020   | 0.006   | ** | -0.074  | 0.017      | 0.000  | **      | -0.008  | 0.006 | 0.146   |        | -0.001 | 0.001   | 0.333  | -0.003 | 0.001  | 0.000 | **     |    |
| complete unemployment rate       | 0.392  | 0.110 | 0.000   | **     | 1.396   | 0.297   | 0.000   | ** | 2.058   | 0.194      | 0.000  | **      | 0.272   | 0.083 | 0.001   | **     | 0.103  | 0.032   | 0.002  | **     | 0.026  | 0.020 | 0.202  |    |
| X <sup>2</sup> value             | 202.97 |       | <0.001  | **     | 116.491 |         | <0.001  | ** | 440.071 |            | <0.001 | **      | 150.10  |       | <0.001  | **     | 74.487 |         | <0.001 | **     | 62.779 |       | <0.001 | ** |

\*:P<0.05 and \*\*P<0.01 by hierarchal linear regression model analysis.

**Supplementary Table S5:** Impacts of dual-income household rate, other household and social factors on suicide mortalities of Female caused by motives associated with family-, health-, economy-, employment-, romance- and school-related problems between 2009 and 2017.

| Factors                          | family |       |         | health |         |         | economy |       |         | employment |        |         | romance |       |         | school |       |         |        |        |       |       |
|----------------------------------|--------|-------|---------|--------|---------|---------|---------|-------|---------|------------|--------|---------|---------|-------|---------|--------|-------|---------|--------|--------|-------|-------|
|                                  | β      | SE    | P value | β      | SE      | P value | β       | SE    | P value | β          | SE     | P value | β       | SE    | P value | β      | SE    | P value |        |        |       |       |
| Model 1                          |        |       |         |        |         |         |         |       |         |            |        |         |         |       |         |        |       |         |        |        |       |       |
| dual-income rate                 | 0.012  | 0.015 | 0.416   | 0.069  | 0.068   | 0.317   | 0.001   | 0.008 | 0.940   | 0.002      | 0.003  | 0.581   | -0.014  | 0.004 | 0.001   | **     | 0.005 | 0.002   | 0.019  |        |       |       |
| X <sup>2</sup> value             | 61.14  |       | <0.001  | **     | 191.20  |         | <0.001  | **    | 51.67   |            | <0.001 | **      | 5.29    |       | <0.001  | **     | 6.13  |         | 0.294  |        |       |       |
| Model 2                          |        |       |         |        |         |         |         |       |         |            |        |         |         |       |         |        |       |         |        |        |       |       |
| dual-income rate                 | 0.046  | 0.017 | 0.009   | **     | 0.233   | 0.070   | 0.002   | **    | 0.021   | 0.009      | 0.024  | *       | 0.006   | 0.005 | 0.210   | -0.006 | 0.005 | 0.196   | 0.006  | 0.003  | 0.016 |       |
| minority rate                    | -0.001 | 0.014 | 0.927   |        | 0.012   | 0.027   | 0.641   |       | 0.005   | 0.007      | 0.473  |         | -0.005  | 0.004 | 0.205   | 0.003  | 0.006 | 0.605   | -0.006 | 0.002  | 0.015 |       |
| elderly rate                     | -0.057 | 0.024 | 0.018   | *      | -0.091  | 0.044   | 0.037   | *     | -0.006  | 0.011      | 0.560  |         | -0.006  | 0.009 | 0.494   | -0.016 | 0.009 | 0.087   | -0.008 | 0.006  | 0.173 |       |
| savings                          | 0.001  | 0.000 | 0.054   |        | -0.001  | 0.001   | 0.313   |       | 0.000   | 0.000      | 0.086  |         | 0.000   | 0.000 | 0.864   | 0.000  | 0.000 | 0.027   | *      | 0.000  | 0.000 | 0.376 |
| liabilities                      | 0.000  | 0.000 | 0.033   | *      | 0.000   | 0.000   | 0.481   |       | 0.000   | 0.000      | 0.983  |         | 0.000   | 0.000 | 0.863   | 0.000  | 0.000 | 0.317   |        | 0.000  | 0.000 | 0.069 |
| yearly incomes                   | -0.002 | 0.001 | 0.093   |        | 0.000   | 0.002   | 0.872   |       | 0.001   | 0.001      | 0.314  |         | 0.000   | 0.000 | 0.768   | 0.000  | 0.000 | 0.780   |        | 0.000  | 0.000 | 0.525 |
| employment rate                  | 0.021  | 0.025 | 0.411   |        | -0.178  | 0.084   | 0.034   | *     | -0.005  | 0.013      | 0.711  |         | -0.002  | 0.006 | 0.754   | -0.004 | 0.011 | 0.736   |        | 0.002  | 0.005 | 0.681 |
| male temporary employment rate   | 0.050  | 0.112 | 0.654   |        | 0.368   | 0.249   | 0.141   |       | 0.006   | 0.062      | 0.917  |         | 0.044   | 0.029 | 0.129   | 0.033  | 0.044 | 0.460   |        | 0.028  | 0.021 | 0.175 |
| female temporary employment rate | -0.106 | 0.054 | 0.051   |        | -0.111  | 0.098   | 0.258   |       | -0.040  | 0.027      | 0.134  |         | -0.029  | 0.013 | 0.019   | -0.039 | 0.019 | 0.042   | *      | -0.016 | 0.010 | 0.111 |
| long-term Care Insurance         | 0.002  | 0.003 | 0.451   |        | -0.026  | 0.011   | 0.021   | *     | -0.002  | 0.002      | 0.271  |         | -0.002  | 0.001 | 0.154   | -0.002 | 0.001 | 0.168   |        | 0.000  | 0.001 | 0.864 |
| complete unemployment rate       | 0.200  | 0.053 | 0.000   | **     | 1.191   | 0.152   | 0.000   | **    | 0.180   | 0.024      | 0.000  | **      | 0.026   | 0.019 | 0.178   | 0.044  | 0.027 | 0.098   |        | 0.004  | 0.010 | 0.691 |
| X <sup>2</sup> value             | 107.67 |       | <0.001  | **     | 369.365 |         | <0.001  | **    | 135.276 |            | <0.001 | **      | 18.19   |       | 0.253   | 59.876 |       | <0.001  | **     | 21.611 |       | 0.118 |

\*:P<0.05 and \*\*:P<0.01 by hierarchal linear regression model analysis.

**Supplementary Table S6:** Impacts of dual-income household rate, other household and social factors on age-dependent suicide mortalities of Male+Female between 2009 and 2017.

| Factors                          | 10s    |       |         | 20s     |        |         | 30s    |         |         | 40s    |        |         | 50s    |        |         | 60s     |        |         | 70s    |         |         | 80s    |        |         |        |        |        |         |        |        |        |    |
|----------------------------------|--------|-------|---------|---------|--------|---------|--------|---------|---------|--------|--------|---------|--------|--------|---------|---------|--------|---------|--------|---------|---------|--------|--------|---------|--------|--------|--------|---------|--------|--------|--------|----|
|                                  | β      | SE    | P value | β       | SE     | P value | β      | SE      | P value | β      | SE     | P value | β      | SE     | P value | β       | SE     | P value | β      | SE      | P value | β      | SE     | P value |        |        |        |         |        |        |        |    |
| Model_1                          |        |       |         |         |        |         |        |         |         |        |        |         |        |        |         |         |        |         |        |         |         |        |        |         |        |        |        |         |        |        |        |    |
| dual-income rate                 | 0.012  | 0.020 | 0.566   | 0.172   | 0.088  | 0.056   | 0.155  | 0.093   | 0.103   | 0.184  | 0.101  | 0.075   | 0.043  | 0.123  | 0.726   | 0.108   | 0.092  | 0.244   | 0.307  | 0.095   | 0.002   | **     | 0.706  | 0.148   | 0.000  | **     |        |         |        |        |        |    |
| X <sup>2</sup> value             | 21.58  |       | 0.001   | *       | 47.63  |         | <0.001 | **      | 100.26  |        | <0.001 | **      | 93.83  |        | <0.001  | **      | 119.95 |         | <0.001 | **      | 140.27  |        | <0.001 | **      | 133.18 |        | <0.001 | **      | 271.48 |        | <0.001 | ** |
| Model_2                          |        |       |         |         |        |         |        |         |         |        |        |         |        |        |         |         |        |         |        |         |         |        |        |         |        |        |        |         |        |        |        |    |
| dual-income rate                 | 0.010  | 0.023 | 0.682   | 0.426   | 0.099  | 0.000   | **     | 0.326   | 0.101   | 0.002  | **     | 0.683   | 0.121  | 0.000  | **      | 0.536   | 0.102  | 0.000   | **     | 0.592   | 0.118   | 0.000  | **     | 0.653   | 0.134  | 0.000  | **     | 0.891   | 0.203  | 0.000  | **     |    |
| minority rate                    | -0.059 | 0.022 | 0.009   | **      | -0.128 | 0.072   | 0.074  | 0.122   | 0.059   | 0.038  | *      | 0.019   | 0.082  | 0.816  | 0.163   | 0.105   | 0.123  | 0.115   | 0.082  | 0.160   | 0.070   | 0.088  | 0.426  | -0.049  | 0.092  | 0.594  |        |         |        |        |        |    |
| elderly rate                     | -0.058 | 0.036 | 0.103   | -0.295  | 0.112  | 0.009   | **     | 0.015   | 0.116   | 0.900  | -0.235 | 0.127   | 0.065  | -0.213 | 0.154   | 0.167   | -0.053 | 0.110   | 0.632  | -0.070  | 0.147   | 0.637  | 0.011  | 0.139   | 0.934  |        |        |         |        |        |        |    |
| savings                          | 0.000  | 0.000 | 0.730   | 0.000   | 0.001  | 0.823   | -0.002 | 0.001   | 0.005   | **     | -0.001 | 0.001   | 0.622  | -0.001 | 0.001   | 0.422   | -0.002 | 0.001   | 0.112  | 0.000   | 0.001   | 0.858  | 0.001  | 0.001   | 0.571  |        |        |         |        |        |        |    |
| liabilities                      | 0.000  | 0.001 | 0.981   | 0.004   | 0.005  | 0.374   | 0.008  | 0.004   | 0.052   | -0.004 | 0.005  | 0.428   | 0.002  | 0.006  | 0.741   | 0.006   | 0.006  | 0.272   | 0.006  | 0.006   | 0.342   | 0.000  | 0.006  | 0.984   |        |        |        |         |        |        |        |    |
| yearly incomes                   | 0.000  | 0.000 | 0.735   | 0.000   | 0.002  | 0.812   | -0.003 | 0.001   | 0.025   | *      | 0.000  | 0.001   | 0.833  | -0.002 | 0.002   | 0.227   | -0.001 | 0.001   | 0.391  | -0.002  | 0.002   | 0.221  | -0.002 | 0.002   | 0.341  |        |        |         |        |        |        |    |
| employment rate                  | 0.048  | 0.033 | 0.149   | 0.217   | 0.137  | 0.113   | 0.031  | 0.111   | 0.782   | 0.085  | 0.178  | 0.634   | 0.059  | 0.232  | 0.800   | -0.033  | 0.257  | 0.899   | 0.039  | 0.166   | 0.812   | -0.356 | 0.274  | 0.195   |        |        |        |         |        |        |        |    |
| male temporary employment rate   | 0.048  | 0.157 | 0.759   | -0.288  | 0.608  | 0.636   | -0.133 | 0.581   | 0.819   | 0.756  | 0.642  | 0.240   | -1.378 | 0.700  | 0.050   | *       | 0.010  | 0.842   | 0.991  | -0.383  | 0.663   | 0.564  | -0.727 | 0.648   | 0.262  |        |        |         |        |        |        |    |
| female temporary employment rate | -0.078 | 0.065 | 0.233   | -0.563  | 0.319  | 0.078   | -0.653 | 0.292   | 0.026   | *      | -0.923 | 0.375   | 0.014  | *      | 0.158   | 0.329   | 0.632  | -0.355  | 0.403  | 0.378   | 0.125   | 0.369  | 0.735  | -0.303  | 0.403  | 0.452  |        |         |        |        |        |    |
| long-term Care Insurance         | -0.002 | 0.004 | 0.614   | 0.001   | 0.018  | 0.964   | -0.019 | 0.016   | 0.227   | -0.030 | 0.024  | 0.201   | -0.004 | 0.030  | 0.883   | -0.019  | 0.024  | 0.421   | 0.037  | 0.028   | 0.180   | -0.027 | 0.029  | 0.346   |        |        |        |         |        |        |        |    |
| complete unemployment rate       | -0.001 | 0.083 | 0.991   | 2.310   | 0.385  | 0.000   | **     | 2.322   | 0.333   | 0.000  | **     | 4.220   | 0.420  | 0.000  | **      | 4.603   | 0.382  | 0.000   | **     | 4.972   | 0.407   | 0.000  | **     | 3.152   | 0.478  | 0.000  | **     | 2.368   | 0.471  | 0.000  | **     |    |
| X <sup>2</sup> value             | 36.26  |       | 0.002   | 152.952 |        | <0.001  | **     | 253.543 |         | <0.001 | **     | 325.36  |        | <0.001 | **      | 360.164 |        | <0.001  | **     | 457.406 |         | <0.001 | **     | 248.05  |        | <0.001 | **     | 364.238 |        | <0.001 | **     |    |

\*:P<0.05 and \*\*:P<0.01 by hierarchal linear regression model analysis.

**Supplementary Table S7:** Impacts of dual-income household rate, other household and social factors on age-dependent suicide mortalities of Male between 2009 and 2017.

| Factors                          | 10s    |       |         | 20s     |       |         | 30s |         |         | 40s    |        |         | 50s   |        |         | 60s     |       |         | 70s    |         |         | 80s    |        |         |       |        |        |         |       |        |    |
|----------------------------------|--------|-------|---------|---------|-------|---------|-----|---------|---------|--------|--------|---------|-------|--------|---------|---------|-------|---------|--------|---------|---------|--------|--------|---------|-------|--------|--------|---------|-------|--------|----|
|                                  | β      | SE    | P value | β       | SE    | P value | β   | SE      | P value | β      | SE     | P value | β     | SE     | P value | β       | SE    | P value | β      | SE      | P value | β      | SE     | P value |       |        |        |         |       |        |    |
| Model_1                          |        |       |         |         |       |         |     |         |         |        |        |         |       |        |         |         |       |         |        |         |         |        |        |         |       |        |        |         |       |        |    |
| dual-income rate                 | 0.022  | 0.027 | 0.415   | 0.390   | 0.139 | 0.007   | **  | 0.250   | 0.152   | 0.107  | 0.352  | 0.160   | 0.033 | *      | 0.258   | 0.181   | 0.162 | 0.061   | 0.165  | 0.713   | 0.205   | 0.152  | 0.184  | 0.779   | 0.246 | 0.003  | **     |         |       |        |    |
| X <sup>2</sup> value             | 10.09  |       | 0.073   | 50.55   |       | <0.001  | **  | 61.41   |         | <0.001 | **     | 104.57  |       | <0.001 | **      | 86.08   |       | <0.001  | **     | 119.32  |         | <0.001 | **     | 88.52   |       | <0.001 | **     | 126.76  |       | <0.001 | ** |
| Model_2                          |        |       |         |         |       |         |     |         |         |        |        |         |       |        |         |         |       |         |        |         |         |        |        |         |       |        |        |         |       |        |    |
| dual-income rate                 | 0.033  | 0.034 | 0.327   | 0.716   | 0.142 | 0.000   | **  | 0.363   | 0.155   | 0.024  | *      | 0.840   | 0.173 | 0.000  | **      | 0.863   | 0.156 | 0.000   | **     | 0.694   | 0.161   | 0.000  | **     | 0.608   | 0.159 | 0.000  | **     | 1.203   | 0.257 | 0.000  | ** |
| minority rate                    | -0.075 | 0.031 | 0.018   | -0.210  | 0.128 | 0.100   |     | -0.057  | 0.110   | 0.604  |        | 0.119   | 0.149 | 0.426  |         | 0.180   | 0.151 | 0.236   |        | 0.143   | 0.110   | 0.197  |        | 0.161   | 0.163 | 0.322  |        | 0.193   | 0.170 | 0.257  |    |
| elderly rate                     | -0.107 | 0.051 | 0.035   | -0.561  | 0.180 | 0.002   | **  | 0.098   | 0.184   | 0.595  |        | -0.151  | 0.238 | 0.526  |         | -0.416  | 0.281 | 0.140   |        | 0.004   | 0.213   | 0.985  |        | 0.027   | 0.199 | 0.891  |        | -0.124  | 0.247 | 0.616  |    |
| savings                          | 0.000  | 0.000 | 0.741   | 0.001   | 0.002 | 0.552   |     | -0.001  | 0.002   | 0.547  | -0.006 | 0.002   | 0.004 | **     | -0.005  | 0.002   | 0.009 | **      | -0.004 | 0.002   | 0.010   | **     | -0.003 | 0.002   | 0.195 |        | -0.004 | 0.003   | 0.228 |        |    |
| liabilities                      | 0.001  | 0.002 | 0.698   | 0.000   | 0.008 | 0.972   |     | -0.007  | 0.007   | 0.306  | 0.024  | 0.009   | 0.006 | **     | 0.022   | 0.010   | 0.036 | *       | 0.008  | 0.007   | 0.255   |        | 0.000  | 0.009   | 0.997 |        | -0.008 | 0.013   | 0.519 |        |    |
| yearly incomes                   | 0.000  | 0.001 | 0.946   | 0.000   | 0.002 | 0.900   |     | -0.002  | 0.002   | 0.379  | -0.007 | 0.003   | 0.025 | *      | -0.010  | 0.003   | 0.002 | **      | -0.006 | 0.002   | 0.019   | *      | -0.006 | 0.003   | 0.055 |        | -0.003 | 0.004   | 0.401 |        |    |
| employment rate                  | 0.043  | 0.054 | 0.428   | 0.326   | 0.248 | 0.189   |     | 0.249   | 0.194   | 0.200  | 0.156  | 0.252   | 0.537 |        | 0.131   | 0.338   | 0.698 |         | -0.296 | 0.338   | 0.380   |        | -0.178 | 0.297   | 0.549 |        | -0.015 | 0.416   | 0.971 |        |    |
| male temporary employment rate   | -0.019 | 0.222 | 0.933   | -0.879  | 1.011 | 0.385   |     | -2.192  | 0.938   | 0.020  | *      | -0.670  | 1.127 | 0.553  |         | -2.849  | 1.541 | 0.065   |        | -0.226  | 1.007   | 0.823  |        | -1.044  | 1.193 | 0.382  |        | -0.196  | 1.931 | 0.919  |    |
| female temporary employment rate | -0.114 | 0.110 | 0.298   | -0.548  | 0.576 | 0.342   |     | -0.145  | 0.479   | 0.762  | -0.488 | 0.535   | 0.362 |        | 0.446   | 0.686   | 0.515 |         | -0.492 | 0.508   | 0.333   |        | 0.160  | 0.653   | 0.807 |        | -0.270 | 0.872   | 0.757 |        |    |
| long-term Care Insurance         | -0.002 | 0.006 | 0.793   | 0.022   | 0.030 | 0.464   |     | 0.020   | 0.022   | 0.375  | 0.001  | 0.037   | 0.988 |        | 0.010   | 0.043   | 0.817 |         | -0.056 | 0.037   | 0.126   |        | 0.015  | 0.045   | 0.742 |        | 0.083  | 0.054   | 0.122 |        |    |
| complete unemployment rate       | 0.012  | 0.123 | 0.923   | 2.655   | 0.562 | 0.000   | **  | 2.426   | 0.557   | 0.000  | **     | 5.598   | 0.506 | 0.000  | **      | 6.133   | 0.652 | 0.000   | **     | 6.427   | 0.577   | 0.000  | **     | 4.244   | 0.592 | 0.000  | **     | 3.232   | 0.909 | 0.000  | ** |
| X <sup>2</sup> value             | 23.04  |       | 0.083   | 116.491 |       | <0.001  | **  | 497.697 |         | <0.001 | **     | 286.04  |       | <0.001 | **      | 275.239 |       | <0.001  | **     | 401.321 |         | <0.001 | **     | 201.44  |       | <0.001 | **     | 174.275 |       | <0.001 | ** |

\*:P<0.05 and \*\*P<0.01 by hierarchal linear regression model analysis.

**Supplementary Table S8:** Impacts of dual-income household rate, other household and social factors on age-dependent suicide mortalities of Female between 2009 and 2017.

| Factors                          | 10s    |       |         | 20s    |       |           | 30s     |       |           | 40s    |       |           | 50s    |       |           | 60s     |       |           | 70s    |       |           | 80s     |       |           |
|----------------------------------|--------|-------|---------|--------|-------|-----------|---------|-------|-----------|--------|-------|-----------|--------|-------|-----------|---------|-------|-----------|--------|-------|-----------|---------|-------|-----------|
|                                  | β      | SE    | P value | β      | SE    | P value   | β       | SE    | P value   | β      | SE    | P value   | β      | SE    | P value   | β       | SE    | P value   | β      | SE    | P value   | β       | SE    | P value   |
| Model 1                          |        |       |         |        |       |           |         |       |           |        |       |           |        |       |           |         |       |           |        |       |           |         |       |           |
| dual-income rate                 | -0.002 | 0.017 | 0.910   | -0.119 | 0.069 | 0.089     | -0.106  | 0.044 | 0.020 *   | -0.158 | 0.059 | 0.010 **  | -0.143 | 0.068 | 0.042 *   | 0.082   | 0.059 | 0.169     | 0.347  | 0.102 | 0.001 **  | 0.532   | 0.126 | 0.000 **  |
| X <sup>2</sup> value             | 5.83   |       | 0.323   | 25.81  |       | <0.001 ** | 55.00   |       | <0.001 ** | 53.47  |       | <0.001 ** | 33.36  |       | <0.001 ** | 63.65   |       | <0.001 ** | 97.30  |       | <0.001 ** | 195.56  |       | <0.001 ** |
| Model 2                          |        |       |         |        |       |           |         |       |           |        |       |           |        |       |           |         |       |           |        |       |           |         |       |           |
| dual-income rate                 | -0.016 | 0.021 | 0.460   | 0.093  | 0.078 | 0.236     | 0.107   | 0.059 | 0.075     | 0.117  | 0.082 | 0.159     | -0.009 | 0.075 | 0.910     | 0.325   | 0.081 | 0.000 **  | 0.695  | 0.186 | 0.001 **  | 0.748   | 0.179 | 0.000 **  |
| minority rate                    | -0.047 | 0.017 | 0.005   | -0.016 | 0.083 | 0.845     | 0.027   | 0.081 | 0.741     | -0.153 | 0.069 | 0.027 *   | 0.014  | 0.089 | 0.877     | -0.115  | 0.062 | 0.065     | 0.056  | 0.088 | 0.525     | 0.306   | 0.106 | 0.004 **  |
| elderly rate                     | -0.010 | 0.035 | 0.773   | 0.007  | 0.134 | 0.958     | -0.088  | 0.097 | 0.365     | -0.243 | 0.112 | 0.031 *   | 0.016  | 0.148 | 0.916     | -0.261  | 0.114 | 0.023 *   | -0.206 | 0.164 | 0.209     | -0.099  | 0.167 | 0.554     |
| savings                          | 0.000  | 0.000 | 0.375   | 0.000  | 0.001 | 0.813     | 0.000   | 0.001 | 0.923     | 0.000  | 0.001 | 0.885     | 0.000  | 0.001 | 0.765     | 0.000   | 0.001 | 0.825     | -0.001 | 0.002 | 0.616     | -0.002  | 0.001 | 0.250     |
| liabilities                      | 0.000  | 0.000 | 0.246   | -0.001 | 0.001 | 0.492     | 0.001   | 0.001 | 0.514     | 0.002  | 0.001 | 0.027 *   | 0.000  | 0.001 | 0.772     | -0.001  | 0.001 | 0.266     | 0.001  | 0.001 | 0.615     | 0.000   | 0.001 | 0.975     |
| yearly incomes                   | 0.000  | 0.001 | 0.979   | 0.011  | 0.004 | 0.014 *   | 0.003   | 0.004 | 0.494     | 0.000  | 0.005 | 0.992     | -0.003 | 0.005 | 0.513     | 0.002   | 0.005 | 0.699     | -0.009 | 0.006 | 0.135     | 0.007   | 0.006 | 0.281     |
| employment rate                  | 0.041  | 0.027 | 0.130   | 0.039  | 0.116 | 0.736     | 0.119   | 0.103 | 0.246     | 0.048  | 0.117 | 0.682     | 0.084  | 0.157 | 0.593     | 0.227   | 0.150 | 0.129     | 0.121  | 0.208 | 0.562     | -0.432  | 0.243 | 0.077     |
| male temporary employment rate   | 0.098  | 0.129 | 0.448   | 0.212  | 0.493 | 0.668     | -0.312  | 0.513 | 0.544     | -0.046 | 0.485 | 0.925     | -0.152 | 0.430 | 0.724     | 0.222   | 0.444 | 0.618     | -0.615 | 0.709 | 0.386     | 0.054   | 0.638 | 0.933     |
| female temporary employment rate | -0.040 | 0.049 | 0.418   | -0.437 | 0.265 | 0.100     | 0.087   | 0.206 | 0.672     | -0.044 | 0.241 | 0.856     | 0.036  | 0.216 | 0.867     | -0.325  | 0.249 | 0.193     | 0.303  | 0.409 | 0.459     | -0.106  | 0.383 | 0.782     |
| long-term Care Insurance         | -0.003 | 0.003 | 0.403   | -0.007 | 0.014 | 0.597     | -0.008  | 0.010 | 0.415     | -0.012 | 0.015 | 0.438     | 0.002  | 0.016 | 0.888     | -0.009  | 0.017 | 0.581     | -0.016 | 0.030 | 0.600     | -0.084  | 0.030 | 0.005 **  |
| complete unemployment rate       | -0.035 | 0.061 | 0.566   | 2.005  | 0.370 | 0.000 **  | 1.957   | 0.276 | 0.000 **  | 2.053  | 0.272 | 0.000 **  | 1.500  | 0.268 | 0.000 **  | 2.226   | 0.309 | 0.000 **  | 2.408  | 0.461 | 0.000 **  | 2.427   | 0.560 | 0.000 **  |
| X <sup>2</sup> value             | 18.41  |       | 0.242   | 93.947 |       | <0.001 ** | 131.279 |       | <0.001 ** | 142.94 |       | <0.001 ** | 74.926 |       | <0.001 ** | 158.901 |       | <0.001 ** | 171.42 |       | <0.001 ** | 295.963 |       | <0.001 ** |

\*:P<0.05 and \*\*P<0.01 by hierarchal linear regression model analysis.
